# Supplementary material for: C2H2-Type Zinc Finger Proteins (DkZF1/2) Synergistically Control Persimmon Fruit Deastringency
Source: PubMed Central journal article supplement (PMC6888379; doi:10.3390/ijms20225611), 2019-11-09
Supplement: ijms-20-05611-s001.pdf [file ijms-20-05611-s001.pdf]

**Table S1.** Sequence identity matrix of DkZF transcription factors.

| <b>Seq-&gt;</b>     | <b><i>DkZF1</i></b> | <b><i>DkZF2</i></b> | <b><i>DkZF4</i></b> | <b><i>DkZF3</i></b> | <b><i>DkZF5</i></b> | <b>Clust</b> |
|---------------------|---------------------|---------------------|---------------------|---------------------|---------------------|--------------|
| <b><i>DkZF1</i></b> | 1                   | 0.261               | 0.319               | 0.23                | 0.248               | 0            |
| <b><i>DkZF2</i></b> | ---                 | 1                   | 0.197               | 0.235               | 0.143               | 0            |
| <b><i>DkZF4</i></b> | ---                 | ---                 | 1                   | 0.227               | 0.253               | 0            |
| <b><i>DkZF3</i></b> | ---                 | ---                 | ---                 | 1                   | 0.171               | 0            |
| <b><i>DkZF5</i></b> | ---                 | ---                 | ---                 | ---                 | 1                   | 0            |
| <b>Clust</b>        | ---                 | ---                 | ---                 | ---                 | ---                 | 0            |

**Table S2:** Full length gene primers of DkZF transcription factors:

| <b>Genes</b> | <b>Primer type</b> | <b>Primers (5'-3')</b>         |
|--------------|--------------------|--------------------------------|
| <i>DkZF1</i> | Forward Primer     | ATGAATAACCCCGACGACCAC          |
|              | Reverse Primer     | TCAAAGACCCAACCTTAAATCCAAGCTC   |
| <i>DkZF2</i> | Forward Primer     | ATGAAGAGAGGAAGAGAAGAAGTTG      |
|              | Reverse Primer     | TCATCATAAAGAACAATGAATCAT       |
| <i>DkZF3</i> | Forward Primer     | ATGATGACCACCAATATTGCCGAGT      |
|              | Reverse Primer     | TTAATTGTTTAGATCATTGCCAAAATTATC |
| <i>DkZF4</i> | Forward Primer     | ATGTTAGACGACAGCCACAACCAC       |
|              | Reverse Primer     | TTACTCTCCTTCTCCTTCTGTAATGGCG   |
| <i>DkZF5</i> | Forward Primer     | ATGGATCTTAAGAAGGGGTCG          |
|              | Reverse Primer     | TTAATCAAGATTATTGGAACCTGAGTTACC |

**Table S3:** qRT-PCR primers of DkZF transcription factors

| <b>Genes</b> | <b>Primer type</b> | <b>Primers (5'-3')</b> |
|--------------|--------------------|------------------------|
| <i>DkZF1</i> | Forward Primer     | GACTCCCTGGATCGTGCTAC   |
|              | Reverse Primer     | TTTCCTCACTGTCGCTCCTT   |
| <i>DkZF2</i> | Forward Primer     | CAGAAGGGGAGATGAGCTTG   |
|              | Reverse Primer     | ATCTCTTCAACACCGGCACT   |
| <i>DkZF3</i> | Forward Primer     | CAACCGGGTAGACCAAGAGA   |
|              | Reverse Primer     | ATTGTATAGGGCACCGACGA   |
| <i>DkZF4</i> | Forward Primer     | CTTACCTCCTCCGAAAATG    |
|              | Reverse Primer     | GCACACGAACACCCTCTTCT   |
| <i>DkZF5</i> | Forward Primer     | TTACGGATGCACATGAGAGG   |
|              | Reverse Primer     | TCTTGGTGTGGCACCTACTG   |
